# Supplementary material for: Preparation of Micron-Scale Activated Carbon-Immobilized Bacteria for the Adsorption–Biodegradation of Diesel Oil
Source: MDPI journal article supplement (doi:10.3390/w14132061), 2022-06-28
Supplement: s1 [file s1]

Archive with 1 entries (1 files):
- water-1699203-supplementary.pdf
