# Supplementary material for: Preparation of Micron-Scale Activated Carbon-Immobilized Bacteria for the Adsorption–Biodegradation of Diesel Oil
Source: MDPI journal article supplement (doi:10.3390/w14132061), 2022-06-28
Supplement: s1 [file s1 › water-1699203-supplementary.pdf]

# Preparation of Micron-Scale Activated Carbon-Immobilized Bacteria for the Adsorption–Biodegradation of Diesel Oil

Wei Zhang, Xiangke Kong, Zhantao Han, Ping Wang, Lisha Ma, Yanyan Wang and Hongkun Chen

## Supplementary Materials:

### 1. The Growth Curves of Bacterial Strains

The growth curves of the screened bacterial strains were detected using the turbidimetric method. The absorption spectrum of the culture medium at 600 nm was detected using a UV–visible spectrophotometer, which reflected the concentration of the bacteria.

As shown in Figure S1, the growth curve of the mixed bacterial strains (MJ) showed no delay period and progressed into the logarithmic growing period directly. After 24 h of culture, it progressed into a stable growth period and could maintain the reproductive stability for 110 h.

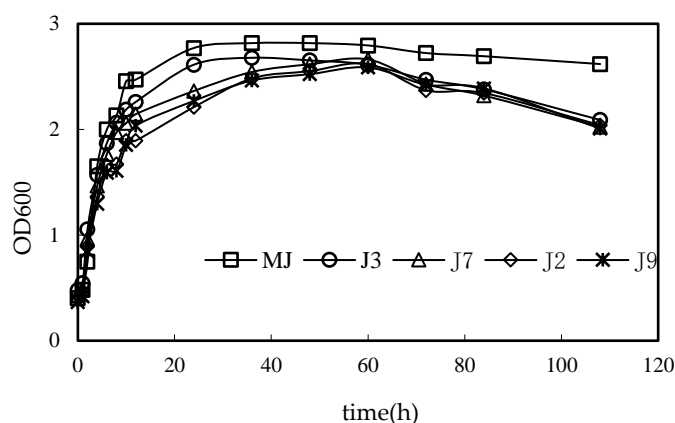

**Figure S1.** Growth curve of the screened bacteria.

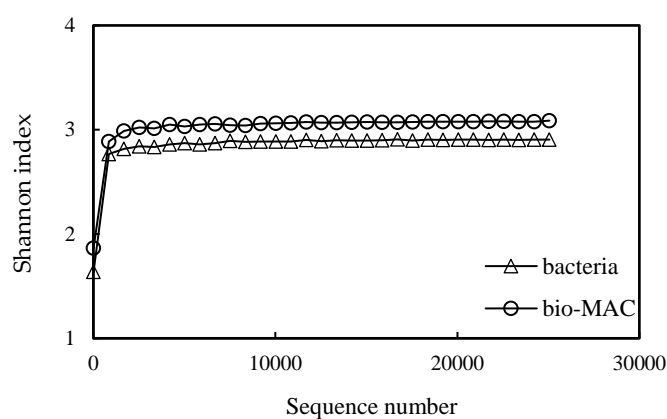

**Figure S2.** Changes in the Shannon–Wiener index values of bacteria after immobilization on bio-MAC.
